# Supplementary material for: High density integration of stretchable inorganic thin film transistors with excellent performance and reliability
Source: PubMed Central journal article supplement (PMC9402572; doi:10.1038/s41467-022-32672-8), 2022-08-24
Supplement: 41467_2022_32672_MOESM1_ESM.pdf [file 41467_2022_32672_MOESM1_ESM.pdf]

1 Supplementary Information

2 **High Density Integration of Stretchable Inorganic Thin Film Transistors**  
3 **with Excellent Performance and Reliability**

4

5 Himchan Oh<sup>1</sup>, Ji-Young Oh<sup>1</sup>, Chan Woo Park<sup>1</sup>, Jae-Eun Pi<sup>1</sup>, Jong-Heon Yang<sup>1</sup>, and Chi-Sun  
6 Hwang<sup>1\*</sup>

7

8 <sup>1</sup>ICT Creative Research Laboratory, Electronics & Telecommunications Research Institute  
9 (ETRI), Daejeon 34129, Republic of Korea

10

11 \*Corresponding author, E-mail address : [hwang-cs@etri.re.kr](mailto:hwang-cs@etri.re.kr)

12

**a** Conventional Approach : Transfer-printed transistors undergo nearly zero strain

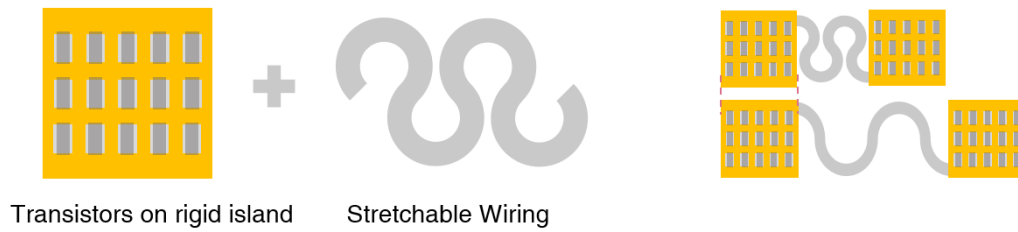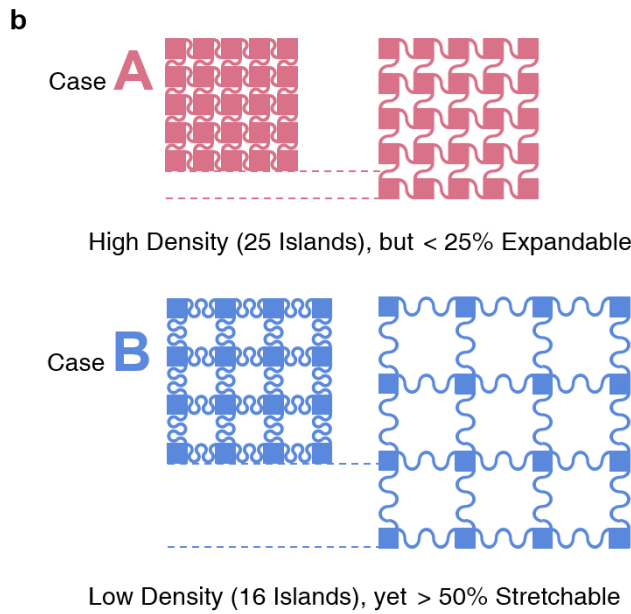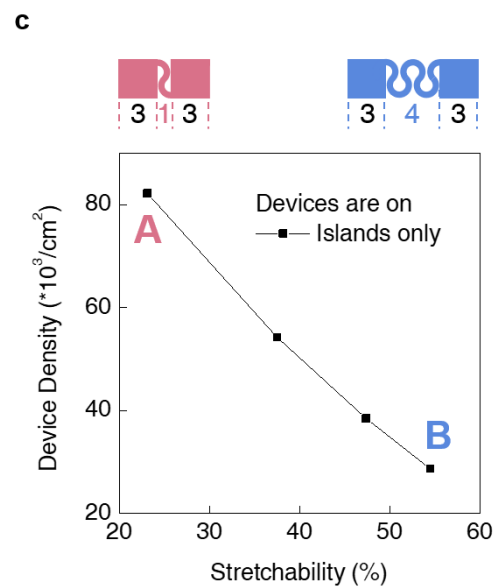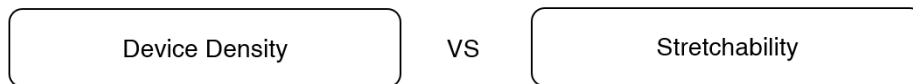

13

14 **Supplementary Figure 1 | Conventional stretchable integrated electronics and their**

15 **limitation. a,** Combination of rigid functional islands and stretchable interconnects to build

16 stretchable electronic systems. Devices on the islands are nearly impervious to strain while

17 entire systems are elongated. **b,** Trade-off between stretchability and integration density in the

18 conventional approach. Many devices can be integrated for case A than B, because number of

19 islands (25) is higher than that of case B (16). On the other hand, case B can be stretched to

20 over 50 %, whereas case A can endure less than 25 % strain.

21

a Case **A** (10 x 10 = 100 islands matrix, -> 180 bridges)

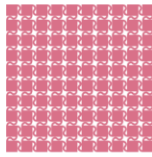

**1) TFTs only on the islands**

$$\begin{aligned} \text{Device density} &= \text{Total \# of TFTs} / \text{Actual die size} \\ &= [(\# \text{ of islands}) * (\# \text{ TFTs on an island})] / \text{Actual die size} \\ &= [(\# \text{ of islands}) * (\text{Area of an island} / \text{Area of a unit TFT})] / \text{Actual die size} \\ &= [(100) * (115600/720)] / (4420)^2 \\ &= \mathbf{82183 \text{ TFTs} / \text{cm}^2} \end{aligned}$$

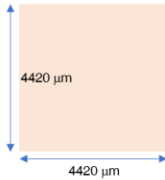

**2) TFTs on the islands and bridges**

$$\begin{aligned} \text{Device density} &= \text{Total \# of TFTs} / \text{Actual die size} \\ &= [(\# \text{ of islands}) * (\# \text{ TFTs on an island}) + (\# \text{ of bridges}) * (\# \text{ TFTs on a bridge})] / \text{Actual die size} \\ &= [(\# \text{ of islands}) * (\text{Area of an island} / \text{Area of a unit TFT}) + (\# \text{ of bridges}) * (\text{Area of a bridge} / \text{Area of a unit TFT})] / \text{Actual die size} \\ &= [(100) * (115600/720) + (180) * (15080/720)] / (4420)^2 \\ &= \mathbf{101480 \text{ TFTs} / \text{cm}^2} \end{aligned}$$

**23% More TFTs can be integrated by direct embedding of TFTs into serpentine bridges**

b Case **B** (10 x 10 = 100 islands matrix, -> 180 bridges)

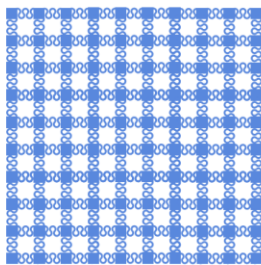

**1) TFTs only on the islands**

$$\begin{aligned} \text{Device density} &= \text{Total \# of TFTs} / \text{Actual die size} \\ &= [(\# \text{ of islands}) * (\# \text{ TFTs on an island})] / \text{Actual die size} \\ &= [(\# \text{ of islands}) * (\text{Area of an island} / \text{Area of a unit TFT})] / \text{Actual die size} \\ &= [(100) * (115600/720)] / (7480)^2 \\ &= \mathbf{28696 \text{ TFTs} / \text{cm}^2} \end{aligned}$$

**2) TFTs on the islands and bridges**

$$\begin{aligned} \text{Device density} &= \text{Total \# of TFTs} / \text{Actual die size} \\ &= [(\# \text{ of islands}) * (\# \text{ TFTs on an island}) + (\# \text{ of bridges}) * (\# \text{ TFTs on a bridge})] / \text{Actual die size} \\ &= [(\# \text{ of islands}) * (\text{Area of an island} / \text{Area of a unit TFT}) + (\# \text{ of bridges}) * (\text{Area of a bridge} / \text{Area of a unit TFT})] / \text{Actual die size} \\ &= [(100) * (115600/720) + (180) * (60320/720)] / (7480)^2 \\ &= \mathbf{55648 \text{ TFTs} / \text{cm}^2} \end{aligned}$$

**93% More TFTs can be integrated by direct embedding of TFTs into serpentine bridges**

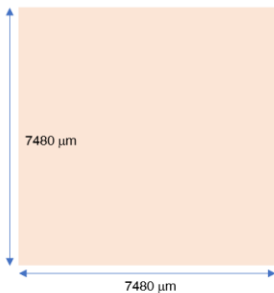

22

23 **Supplementary Figure 2 | Calculation of integrated density for combination of rigid**  
 24 **islands and serpentine bridges. a, Case A** (the length ratio between square island and bridge  
 25 is 3 to 1). **23% more TFTs can be integrated into serpentine bridges. b, Case B** (the length ratio  
 26 between square island and bridge is 3 to 4). **93% more TFTs can be integrated by using bridge**  
 27 **space without sacrificing stretchability. Refer to supplementary Fig. 3 and 4 for dimensions of**  
 28 **square island and serpentine bridge.**

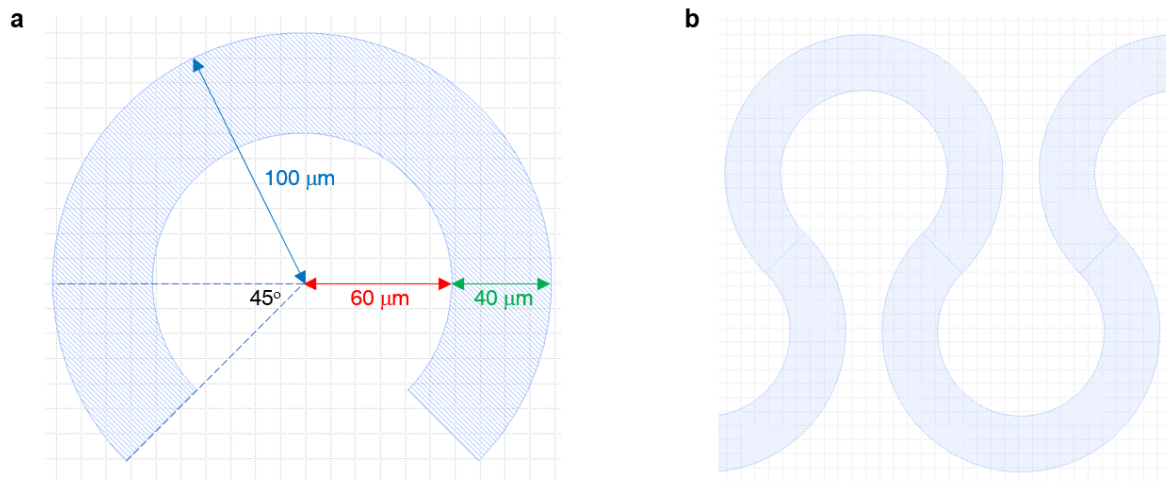

29

30 **Supplementary Figure 3 | Geometric parameters for serpentine strings. a,** A sub-cell for

31 constructing the serpentine bridges. **b,** A string by connecting the sub-cells.

32

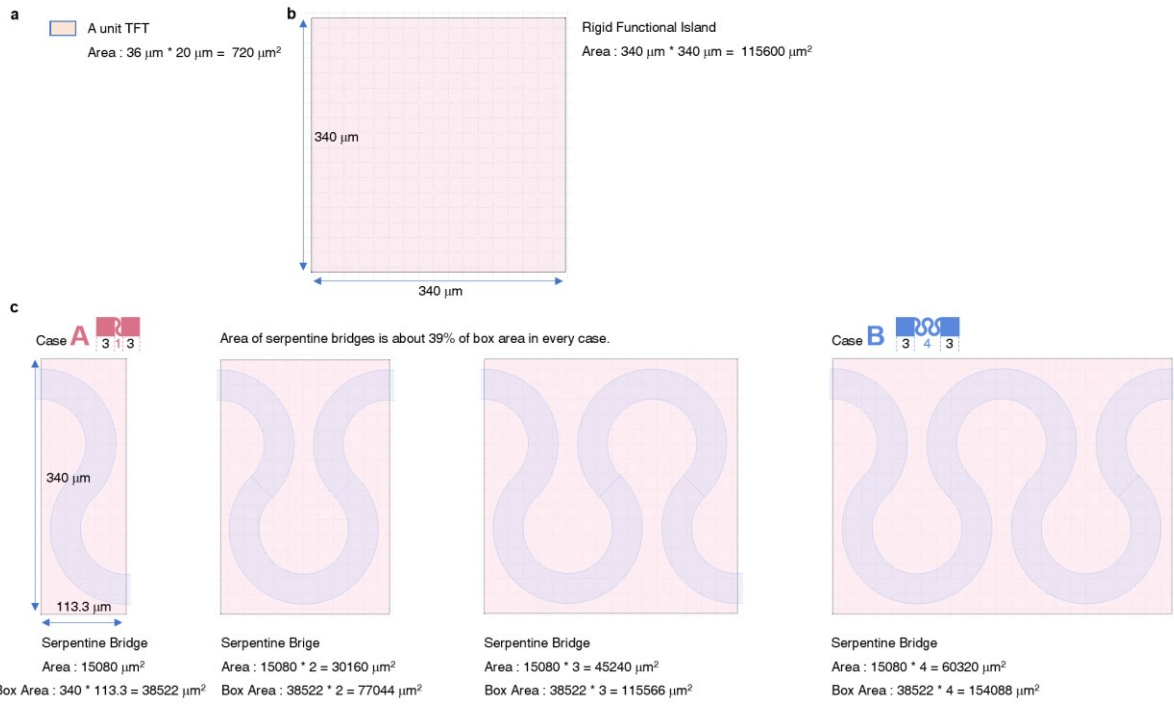

33

34 **Supplementary Figure 4 | Size comparison among the parts for stretchable electronics. a,**

35 **A unit TFT. b, Rigid functional island. c, Serpentine bridges with various lengths (Case A and**

36 **B). Area of serpentine string is about 39% of corresponding box area.**

| Ref# | Channel    | Mobility                                                     | Stretchability | Device density                  | Year of Publication |
|------|------------|--------------------------------------------------------------|----------------|---------------------------------|---------------------|
| 30   | IGZO       | 12.83 cm <sup>2</sup> /Vs                                    | 5 %            | 204 TFT/cm <sup>2</sup>         | 2013                |
| 17   | IGZO       | 11.3 cm <sup>2</sup> /Vs                                     | <b>210 %</b>   | 400 TFT/cm <sup>2</sup>         | 2015                |
| 31   | IGZO       | 2.07 cm <sup>2</sup> /Vs                                     | 20 %           | Single TR                       | 2015                |
| 32   | IGZO       | 0.1 cm <sup>2</sup> /Vs                                      | 50 %           | Single TR                       | 2016                |
| 33   | IGZO       | 13.7 cm <sup>2</sup> /Vs                                     | 5 %            | <b>1092 TFT/cm<sup>2</sup></b>  | 2017                |
| 19   | IGZO       | 1.2 cm <sup>2</sup> /Vs                                      | 20 %           | 36 TFT/cm <sup>2</sup>          | 2018                |
| 34   | IGZO       | 1.2 cm <sup>2</sup> /Vs                                      | 30 %           | 4 TFT/cm <sup>2</sup>           | 2018                |
| 35   | IGZO       | 14 cm <sup>2</sup> /Vs                                       | 70 %           | 56 TFT/cm <sup>2</sup>          | 2019                |
| 36   | IZO        | 2.24 cm <sup>2</sup> /Vs                                     | 30 %           | 58 TFT/cm <sup>2</sup>          | 2019                |
| 37   | IGZO       | Not available, only in changes regarding to unstretched one. | 60 %           | 124 TFT/cm <sup>2</sup>         | 2019                |
| 38   | IGZO       | 13.1 cm <sup>2</sup> /Vs                                     | 30 %           | 135 TFT/cm <sup>2</sup>         | 2021                |
| 39   | IGZO       | <b>24.9 cm<sup>2</sup>/Vs</b>                                | 30 %           | <1 TFT/cm <sup>2</sup>          | 2022                |
| -    | <b>ITO</b> | <b>56.2 cm<sup>2</sup>/Vs</b>                                | <b>100 %</b>   | <b>30000 TFT/cm<sup>2</sup></b> | <b>This work</b>    |

37

38 **Supplementary Table 1 | Studies on the stretchable oxide TFTs**

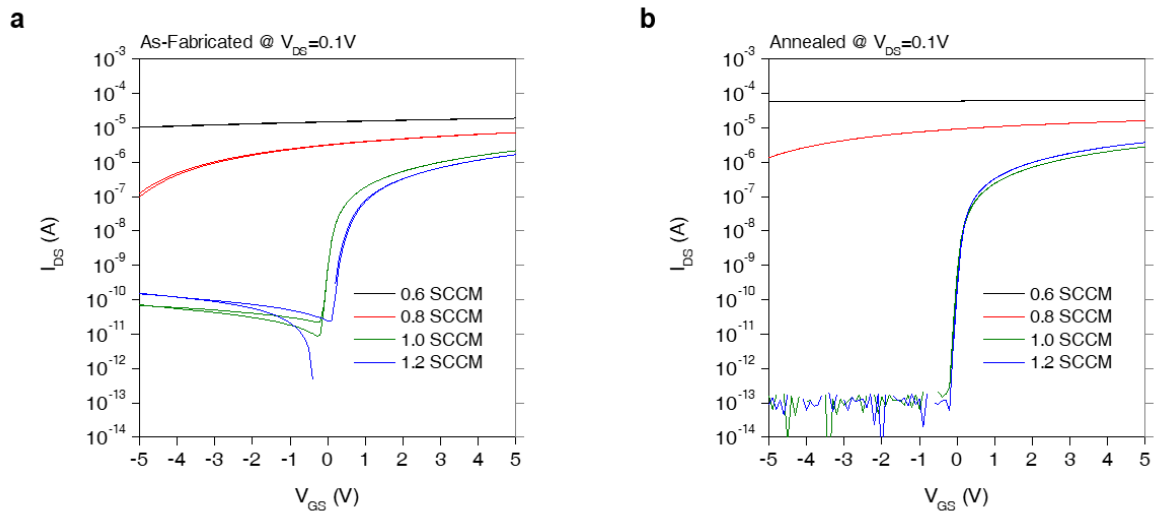

39

40 **Supplementary Figure 5 | Impact of O<sub>2</sub> flow rate during the deposition of ITO channel**

41 **layer on the device characteristics. a,** Transfer curves measured before thermal annealing. **b,**

42 Transfer characteristics after thermal annealing. With low O<sub>2</sub> flow rates (< 1.0 SCCM), the

43 carrier concentration is too high to be depleted by the gate bias.

44

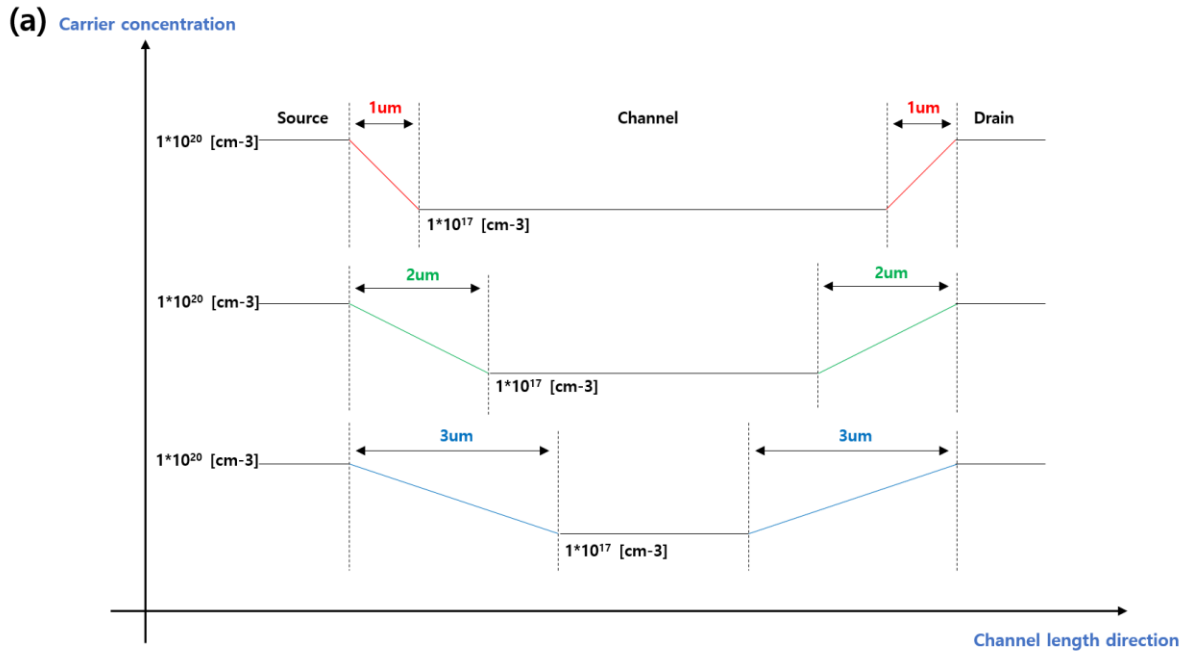

45

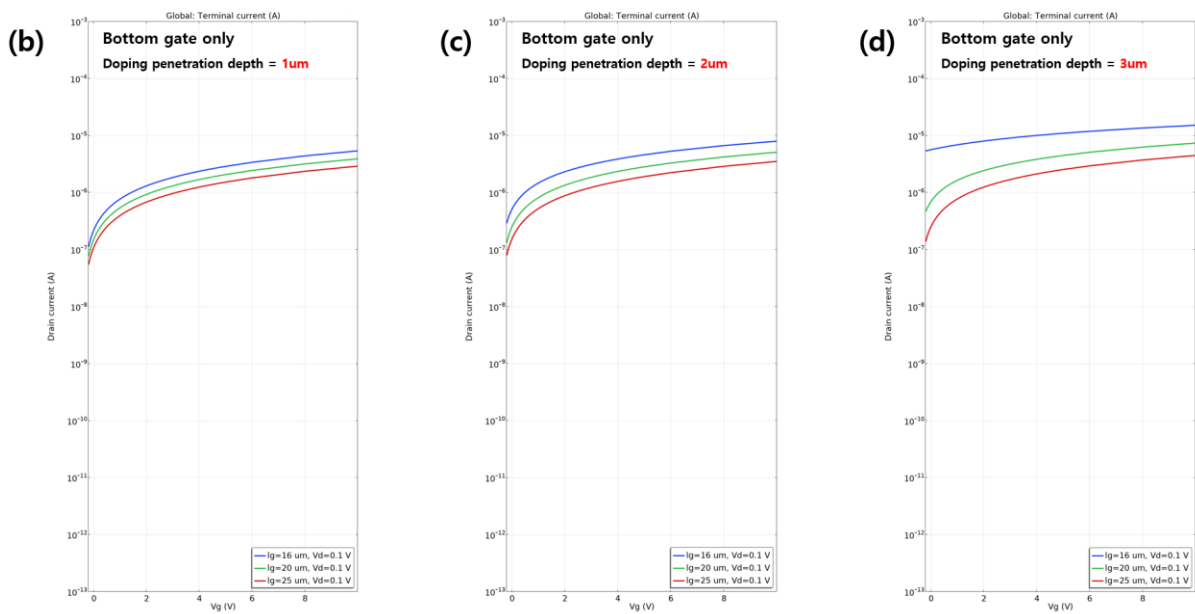

46

47 **Supplementary Figure 6 | Impact of dopant penetration depth on the TFT characteristics**

48 **a**, Carrier density profiles with various penetration depths from 1 to  $3 \mu\text{m}$  for device simulation.

49 **b-d**, Simulated transfer characteristics of devices with different penetration depths (from 1 to

50  $3 \mu\text{m}$ ).

51



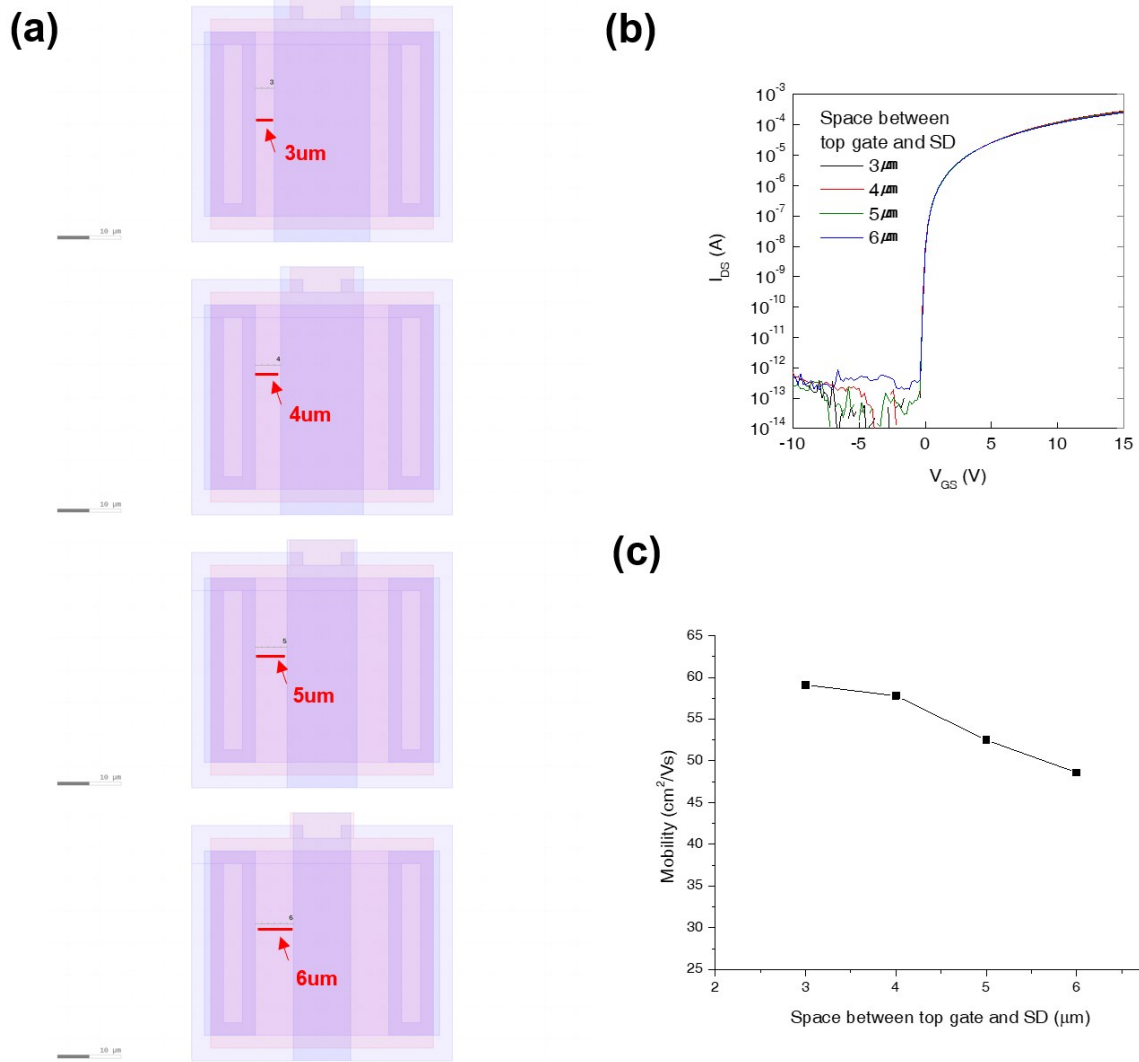

52

53 **Supplementary Figure 7 | Impact of space between top gate and SD on device**  
 54 **characteristics.** **a,** Schematics of devices with different widths of gap. **b,** Transfer  
 55 characteristics of the devices with various gap size. **c,** Field effect mobilities extracted from b.

(a)

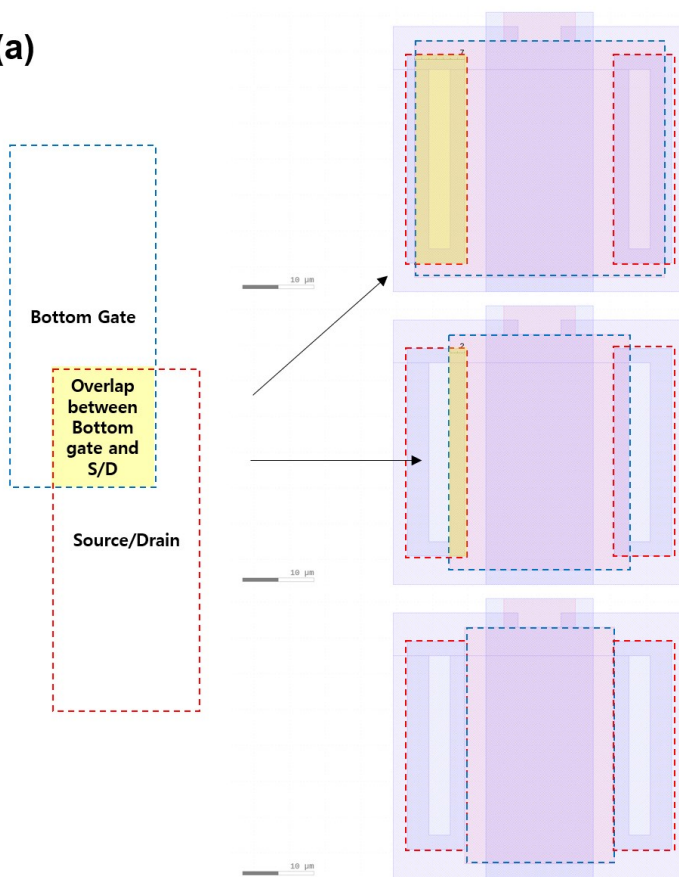

(b)

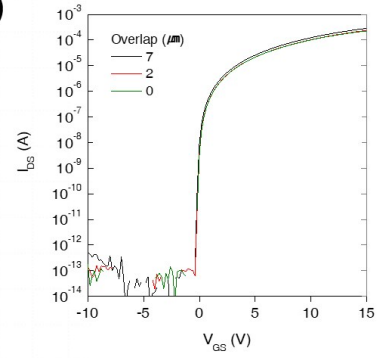

| Overlap                                     | 7um                  | 2um                  | 0um                  |
|---------------------------------------------|----------------------|----------------------|----------------------|
| Field-effect mobility (cm <sup>2</sup> /Vs) | 57.6                 | 47.2                 | 45.9                 |
| Drain current @ V <sub>GS</sub> =10V (A)    | 2.9*10 <sup>-4</sup> | 2.4*10 <sup>-4</sup> | 2.3*10 <sup>-4</sup> |

56

57 **Supplementary Figure 8 | Impact of overlap between bottom gate and SD on the device**

58 **characteristics. a, Schematics indicating overlapped regions. b, Transfer curves and extracted**

59 **mobility values from them.**

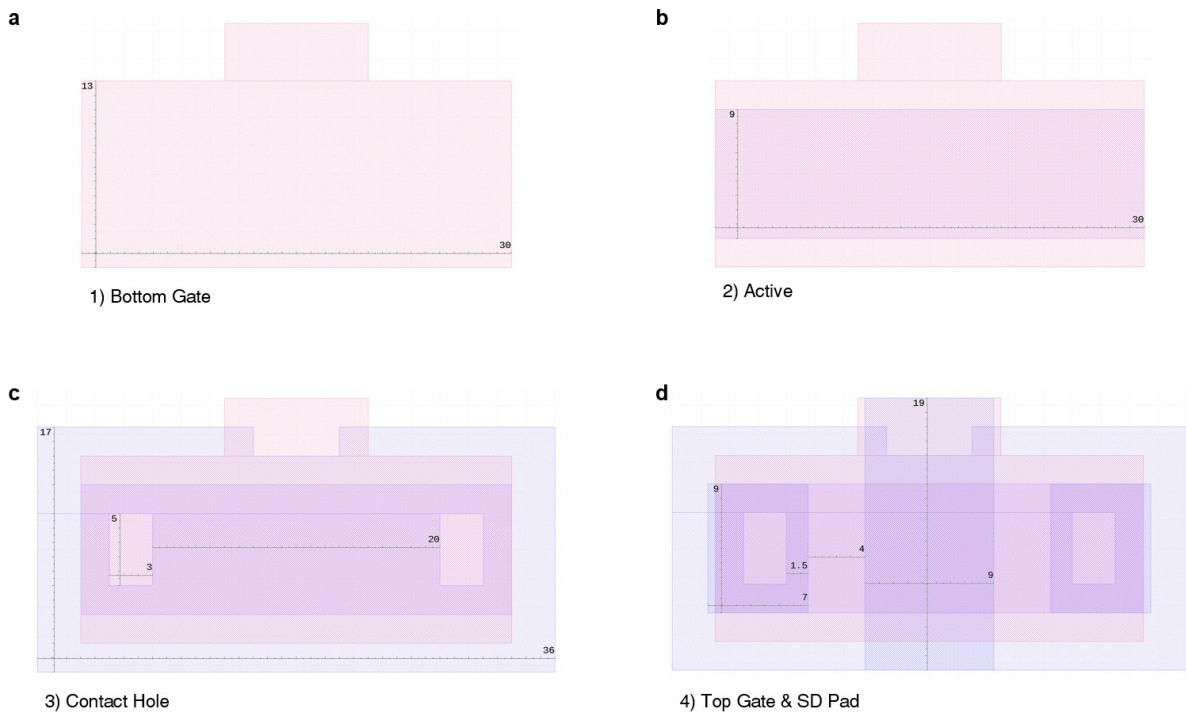

60

61 **Supplementary Figure 9 | Layout of a unit TFT with dimensions. a, Bottom gate b, Active**

62 **layer c, Contact hole. d Top gate with SD pad.**

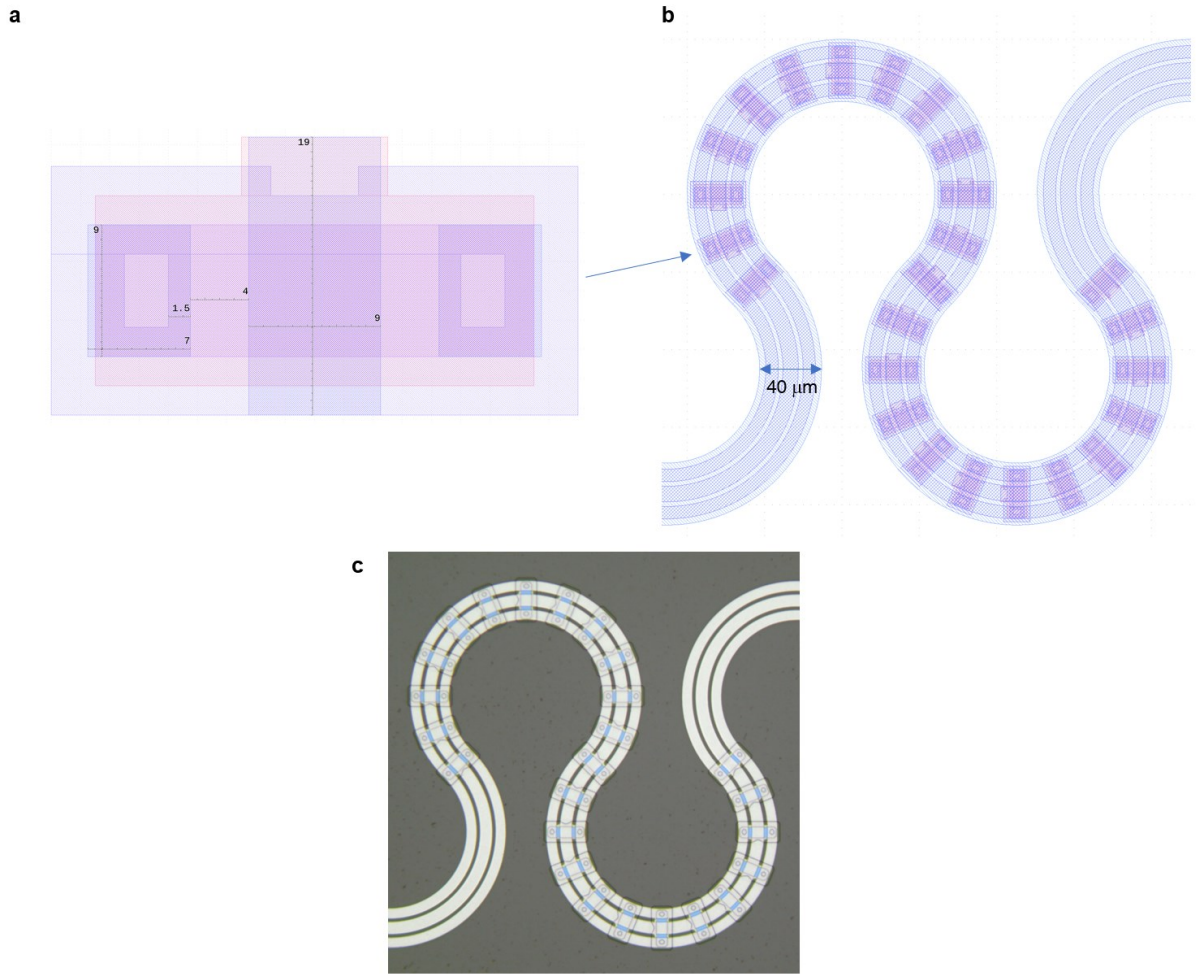

63

64 **Supplementary Figure 10 | Arrayed 25 unit TFTs on serpentine bridges. a, A unit TFT. b,**

65 Serpentine string with 25 unit TFTs. c, Optical microscopic image of actual TFTs and

66 serpentine metal lines.

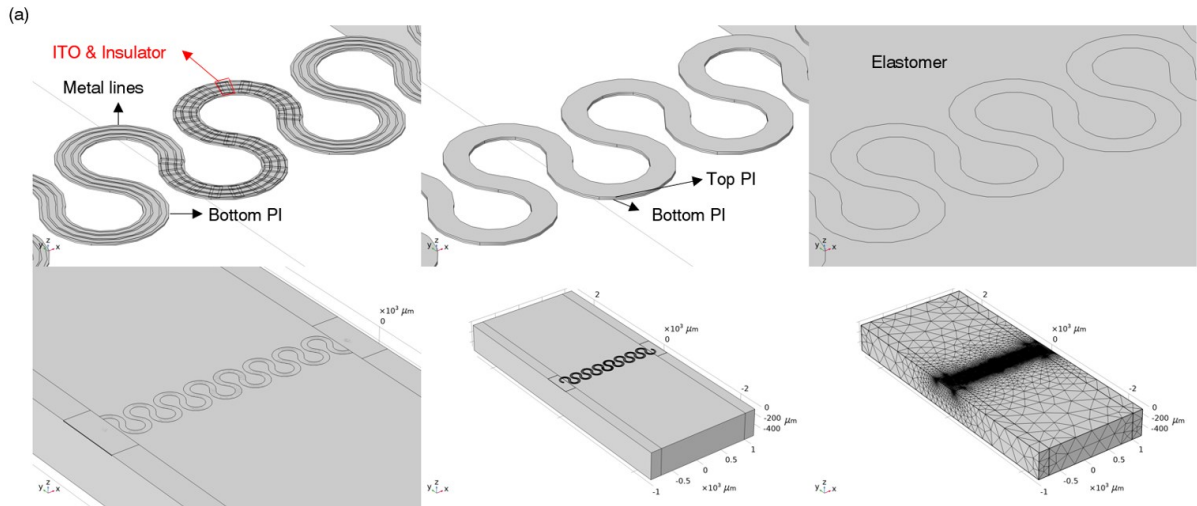

(b) Without top PI

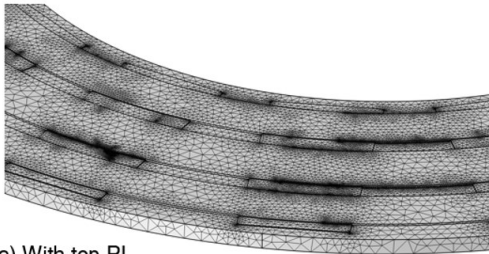

(c) With top PI

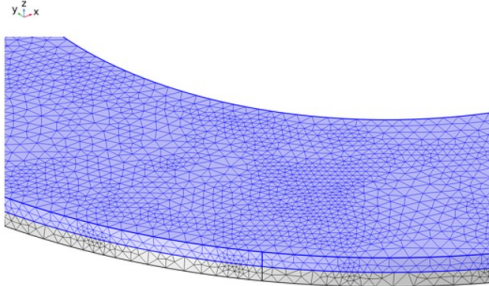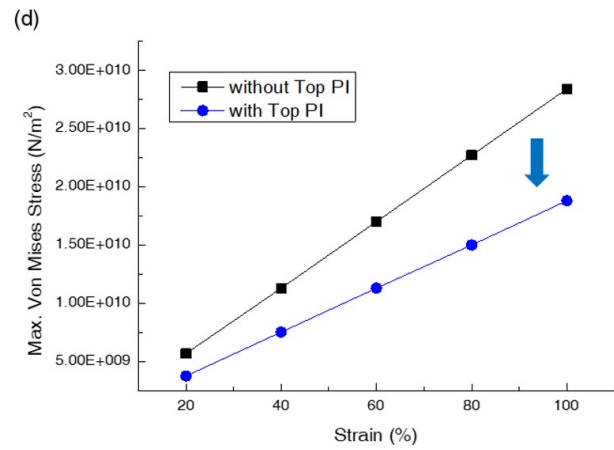

67

68 **Supplementary Figure 11 | Finite element analyses (FEA) on the deformations of TFT-**

69 **embedded serpentine string. a,** A 3D Model and meshing of it for calculations. **b,** A model of

70 serpentine string without top PI. **c,** A model with top PI. **d,** Maximum Von Mises stress on the

71 stretched devices with and without top PI.

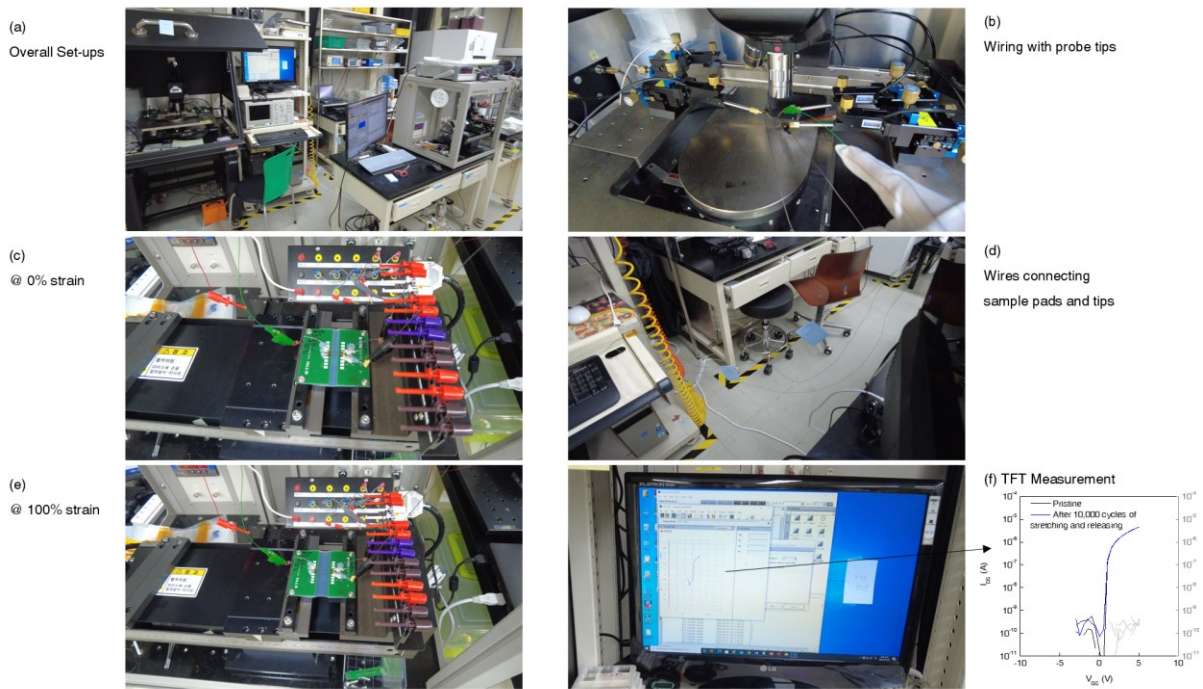

72

73 **Supplementary Figure 12 | Cyclic stretching test.** **a**, Experimental set-up with sample stage  
 74 and PC to control the movement of stage. **b**, Wires connected to probe tips in the dark box. **c**,  
 75 Sample at 0 % strain with wire connected to measurement pads. **d**, Long wires connecting  
 76 sample pads to probe tips. **e**, Sample at 100 % strain. **f**, real-time measurement of TFT  
 77 characteristic during the stretching test.

(a) A rod with a radius of 3.12mm + 0.7mm (thickness of elastomer)

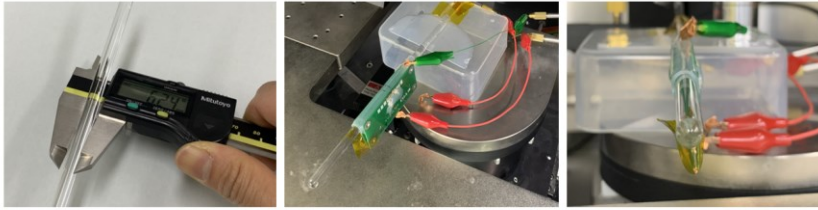

(b) A rod with a radius of 0.85mm + 0.7mm (thickness of elastomer)

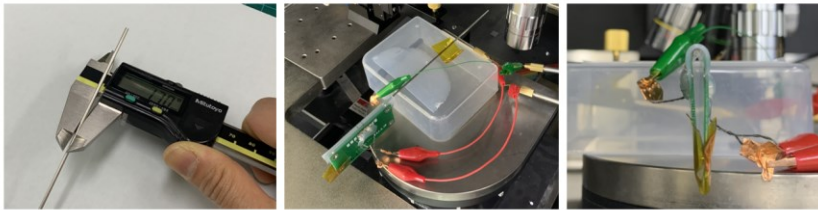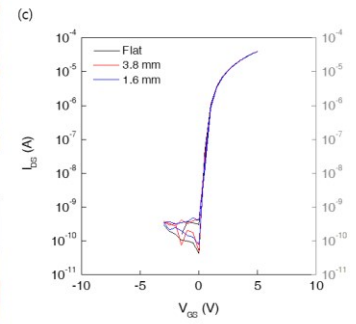

78

79 **Supplementary Figure 13 | Bending test.** **a**, A rod with a radius of 3.12mm and sample bended  
80 along with it. **b**, A rod with a radius of 0.85mm and sample folded along with it. **c**, Transfer  
81 curves at different bending radii (Thickness of elastomer (0.7mm) is added to the radius of each  
82 rod).

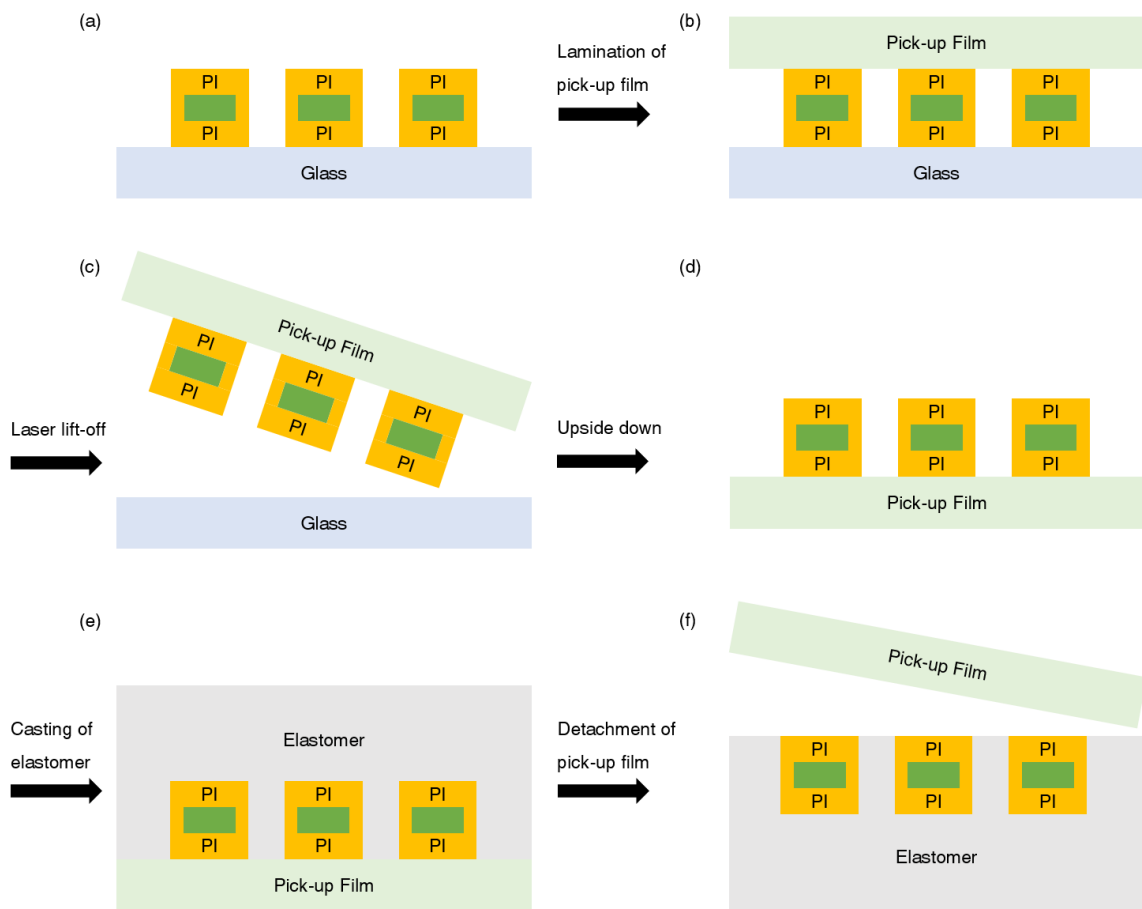

83

84 **Supplementary Figure 14 | Transfer of fabricated device to elastomer. a**, Fabricated devices  
 85 on the glass wafer. **b**, Lamination of pick-up film on the device. **c**, Detachment of PI from the  
 86 glass by laser lift-off technique. **d**, Transferred devices on the pick-up film. **e**, Casting of  
 87 elastomer on the devices. **f**, Delamination of the pick-up film.

88
